# Supplementary material for: ARD1-mediated aurora kinase A acetylation promotes cell proliferation and migration
Source: PubMed Central journal article supplement (PMC5593637; doi:10.18632/oncotarget.19332), 2017-07-18
Supplement: oncotarget-08-57216-s001.pdf [file oncotarget-08-57216-s001.pdf]

## ARD1-mediated aurora kinase A acetylation promotes cell proliferation and migration

### SUPPLEMENTARY MATERIALS

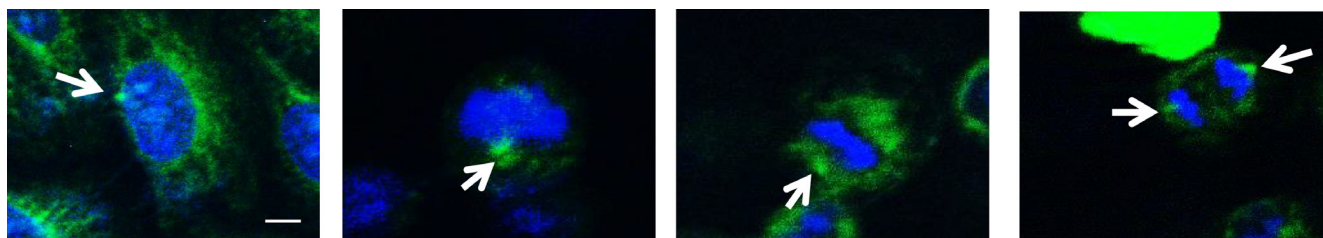

**Supplementary Figure 1: Centrosome-like localization of ARD1.** Overexpressing GFP-ARD1 cells were synchronized, fixed and then mounted. Cells were then visualized by confocal microscope. DNA was counter-stained by Hoechst. Scale bar, 5  $\mu$ m. Subcellular localization of ARD1 is indicated by arrows.
